# Supplementary material for: Anti-TIGIT differentially affects sepsis survival in immunologically experienced versus previously naive hosts
Source: PubMed Central journal article supplement (PMC8021109; doi:10.1172/jci.insight.141245), 2021-03-08
Supplement: jciinsight-6-141245-s190.pdf [file jciinsight-6-141245-s190.pdf]

## Supplementary Material

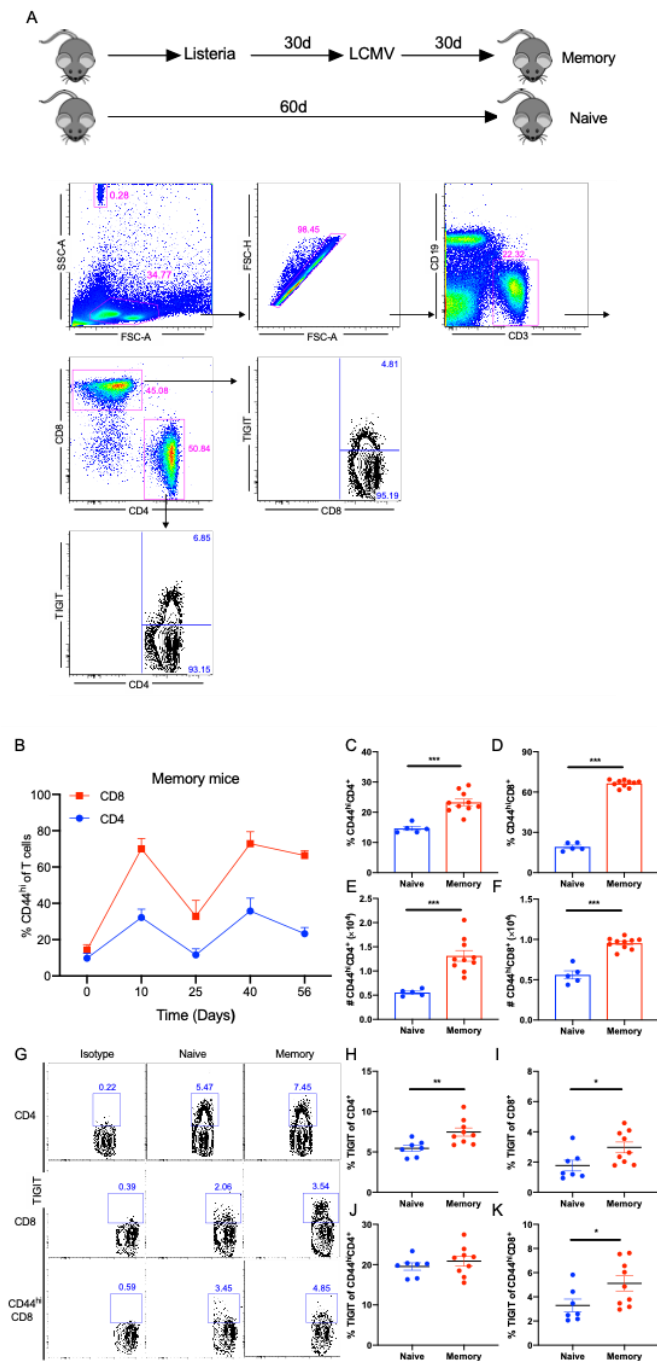

**Supplemental Figure 1. TIGIT expression on both CD4<sup>+</sup> and CD8<sup>+</sup> T cells is upregulated in memory mice relative to naïve mice.** Naïve B6 mice were infected with *Listeria monocytogenes* (LM) and were infected with LCMV intraperitoneally 30 days later. Age-matched naïve mice were used as controls (A). Representative flow plots of the gating strategy to identify the TIGIT expression on CD4<sup>+</sup> and CD8<sup>+</sup> T cells in the spleen of memory mice. The frequency of memory (CD44<sup>hi</sup>) T cells was assessed on d0, d10, d25, d40, d56 post-LM by flow cytometry. (B) Expansion of CD44<sup>hi</sup> CD4<sup>+</sup> and CD44<sup>hi</sup> CD8<sup>+</sup> T cells in the blood over time following antigen exposure (n=10/group). (C-D) Summary of frequency of CD44<sup>hi</sup> CD4<sup>+</sup> T cells and CD44<sup>hi</sup> CD8<sup>+</sup> T cells in naïve mice compared with memory mice on d56 following LM infection (n=5-10/group). (E-F) Absolute numbers of CD44<sup>hi</sup> CD4<sup>+</sup> T cells and CD44<sup>hi</sup> CD8<sup>+</sup> T cells in the blood on d56 following LM infection (n=5-10/group). (G) Representative flow plots of TIGIT expression on CD4<sup>+</sup>, CD8<sup>+</sup>, and CD44<sup>hi</sup> CD8<sup>+</sup> T cells. (H-I) Summary data of the percentage of TIGIT on bulk CD4<sup>+</sup> and CD8<sup>+</sup> T cells in spleen in naïve and memory mice (n=7-9/group). (J-K) Summary data of the percentage of TIGIT on CD44<sup>hi</sup> CD4<sup>+</sup> and CD44<sup>hi</sup> CD8<sup>+</sup> T cells in the spleens in memory versus naïve mice (n=7-9/group). Two groups were compared with the Mann-Whitney nonparametric test. \*, p<0.05. \*\*, p<0.01. \*\*\*, p<0.001. All data expressed as mean ± SEM and were pooled from two independent experiments.

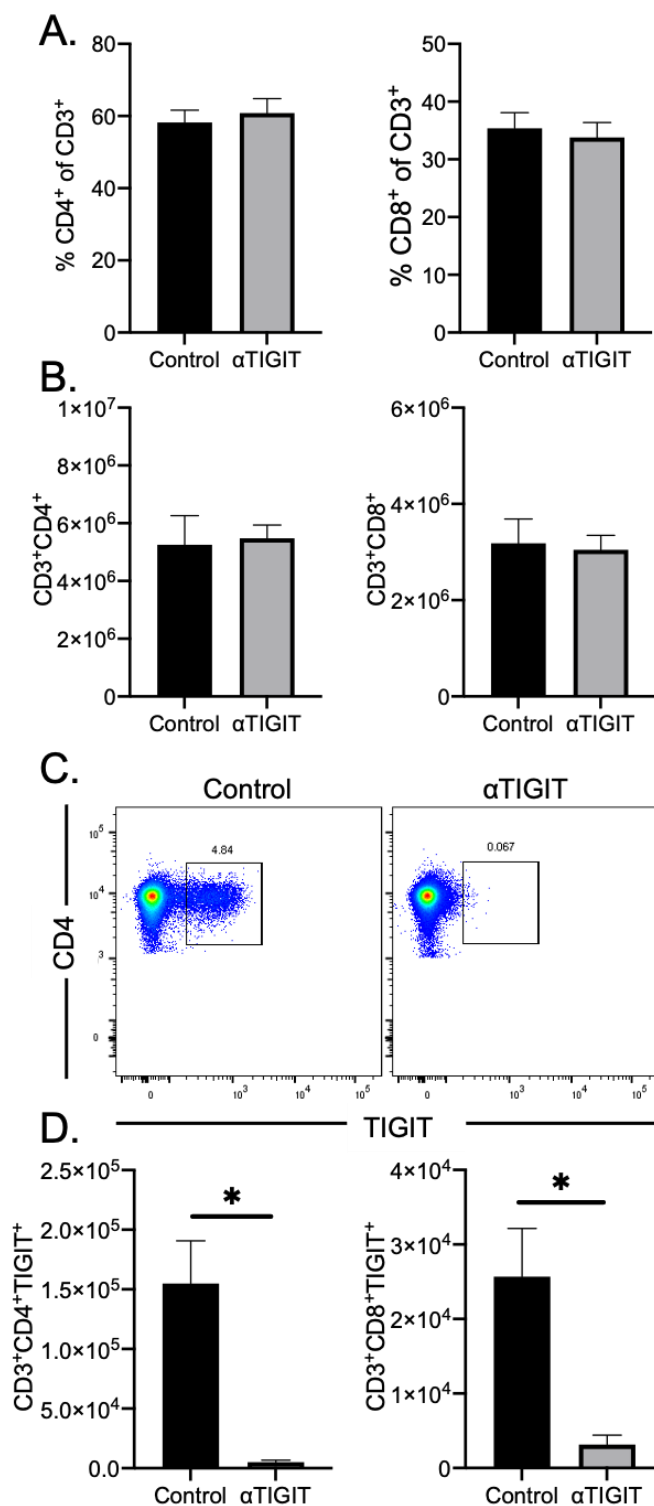

**Supplemental Figure 2. Anti-TIGIT Clone 1G9 is a blocking antibody.** Memory septic mice were injected with anti-TIGIT in Figure 2 and splenocytes were stained with anti-TIGIT. Frequencies and absolute numbers of CD4<sup>+</sup> and CD8<sup>+</sup> T cells were analyzed. Two groups were compared with the Mann-Whitney nonparametric test. \*,  $p < 0.05$ . All data expressed as mean  $\pm$  SEM and were pooled from two independent experiments.

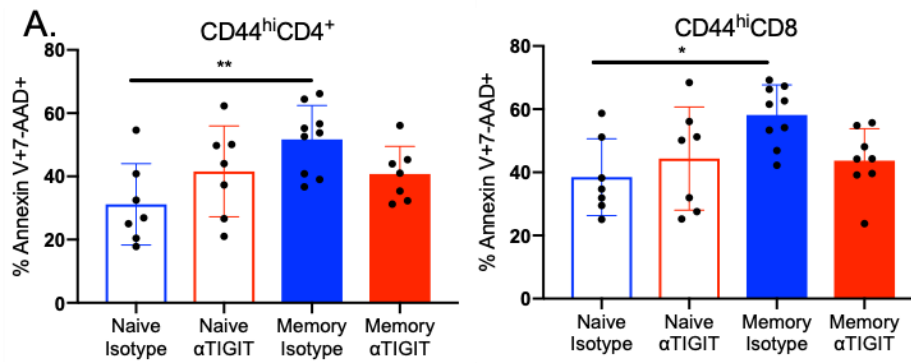

**Supplemental Figure 3. Frequencies of AnnexinV<sup>+</sup>7AAD<sup>+</sup> late apoptotic cells are not affected in previously naïve or memory septic mice following anti-TIGIT antibody administration.** Memory mice and age-matched naïve controls received CLP, followed by injection of αTIGIT Ab or isotype control Ab at 12h and 24h post-CLP. Mice were sacrificed and spleens were harvested at 48h after CLP. Splenocytes were stained with Annexin V and 7-AAD for T cell apoptosis by flow cytometry. (A) Summary data depicting frequency of late apoptotic (AnnexinV<sup>+</sup>7-AAD<sup>+</sup>) CD44<sup>hi</sup>CD4<sup>+</sup> and (B) CD44<sup>hi</sup>CD8<sup>+</sup> T cells in previously naïve vs. memory mice treated with αTIGIT Ab or isotype Ab (n=7-9/group). Groups were compared using one-way ANOVA analysis and Turkey multiple comparison test. \*,  $p < 0.05$ , \*\*,  $p < 0.01$ .

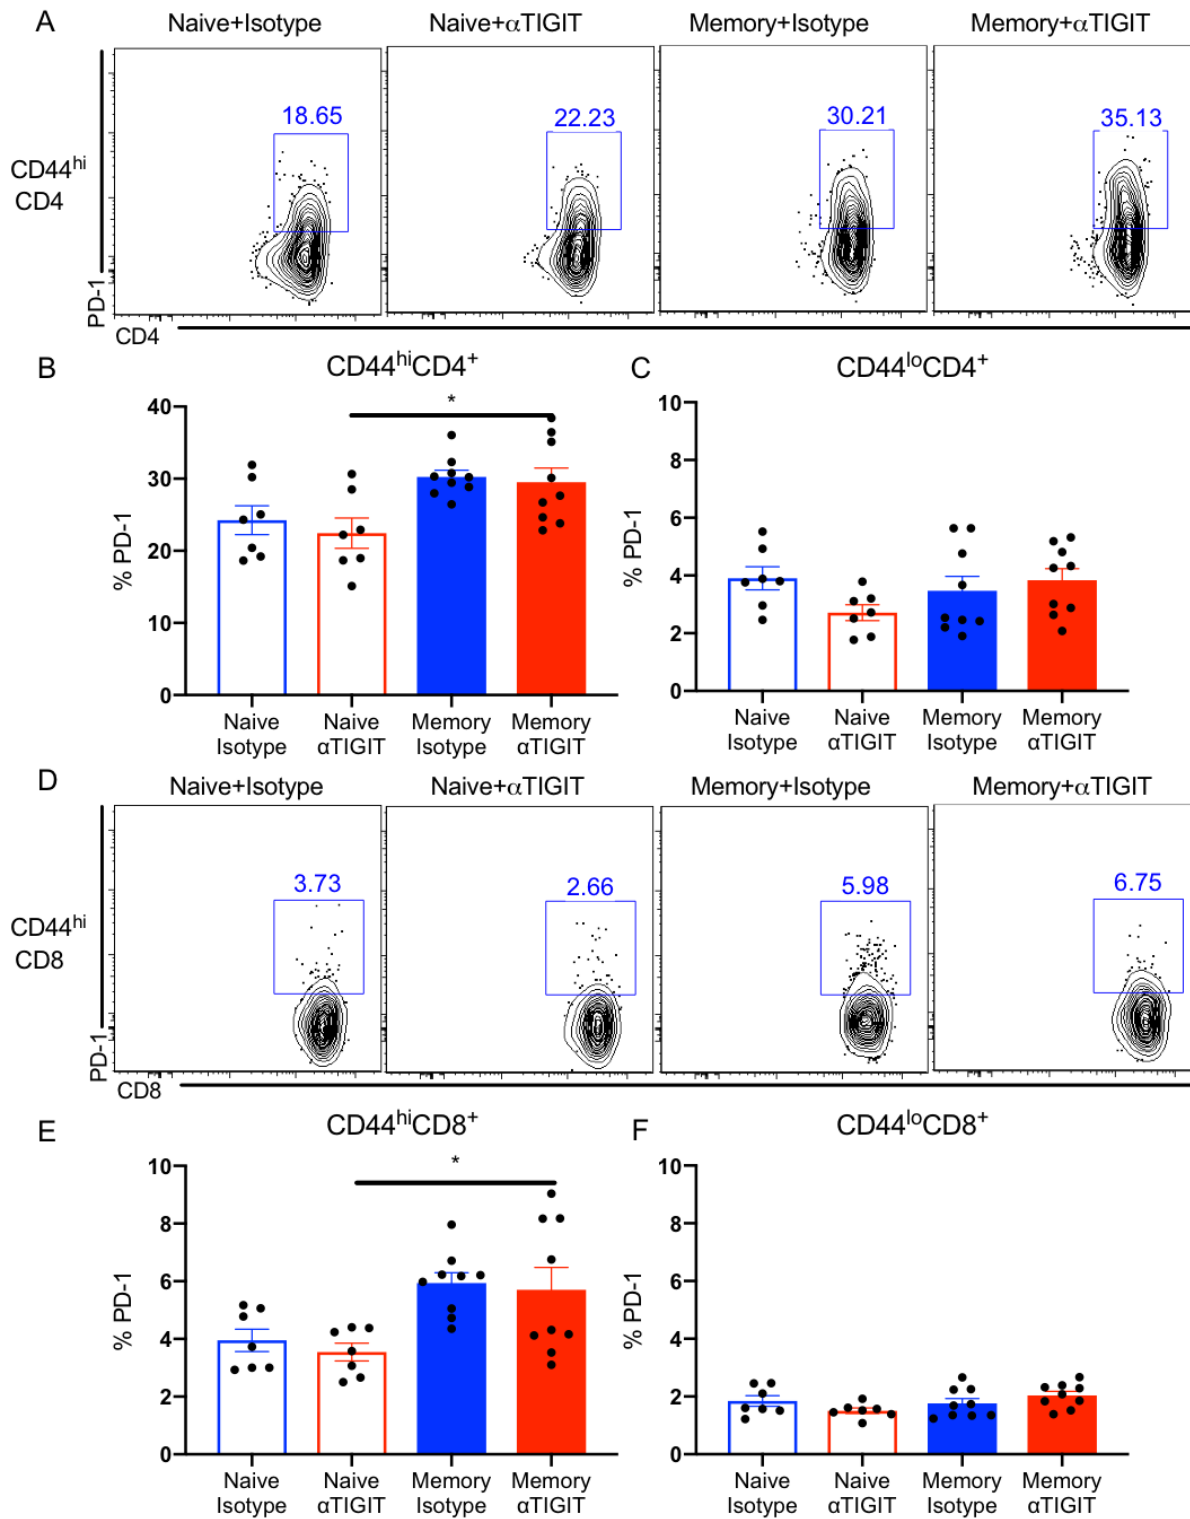

**Supplemental Figure 4. Memory T cells from memory mice treated with  $\alpha$ TIGIT Ab exhibit the increase of PD-1 compared with  $\alpha$ TIGIT-treated previously naïve mice.** Splenic T cells were harvested and the expression of PD-1 was assessed at 48h after CLP. (A) Representative flow plots for PD-1 on CD44<sup>hi</sup>CD4<sup>+</sup> T cells. (B-C) Summary data of the percentage of PD-1 on CD44<sup>hi</sup>CD4<sup>+</sup> and CD44<sup>lo</sup>CD4<sup>+</sup> T cells. (D) Representative flow plots for PD-1 on CD44<sup>hi</sup>CD8<sup>+</sup> T cells (n=7-9/group). (E-F) Summary data of the percentage of PD-1 on CD44<sup>hi</sup>CD8<sup>+</sup> and CD44<sup>lo</sup>CD8<sup>+</sup> T cells (n=7-9/group). Results were representative of two independent experiments. Error bars represent mean  $\pm$  SEM. Groups were compared using one-way ANOVA analysis and Turkey multiple comparison test. \*,  $p < 0.05$ .

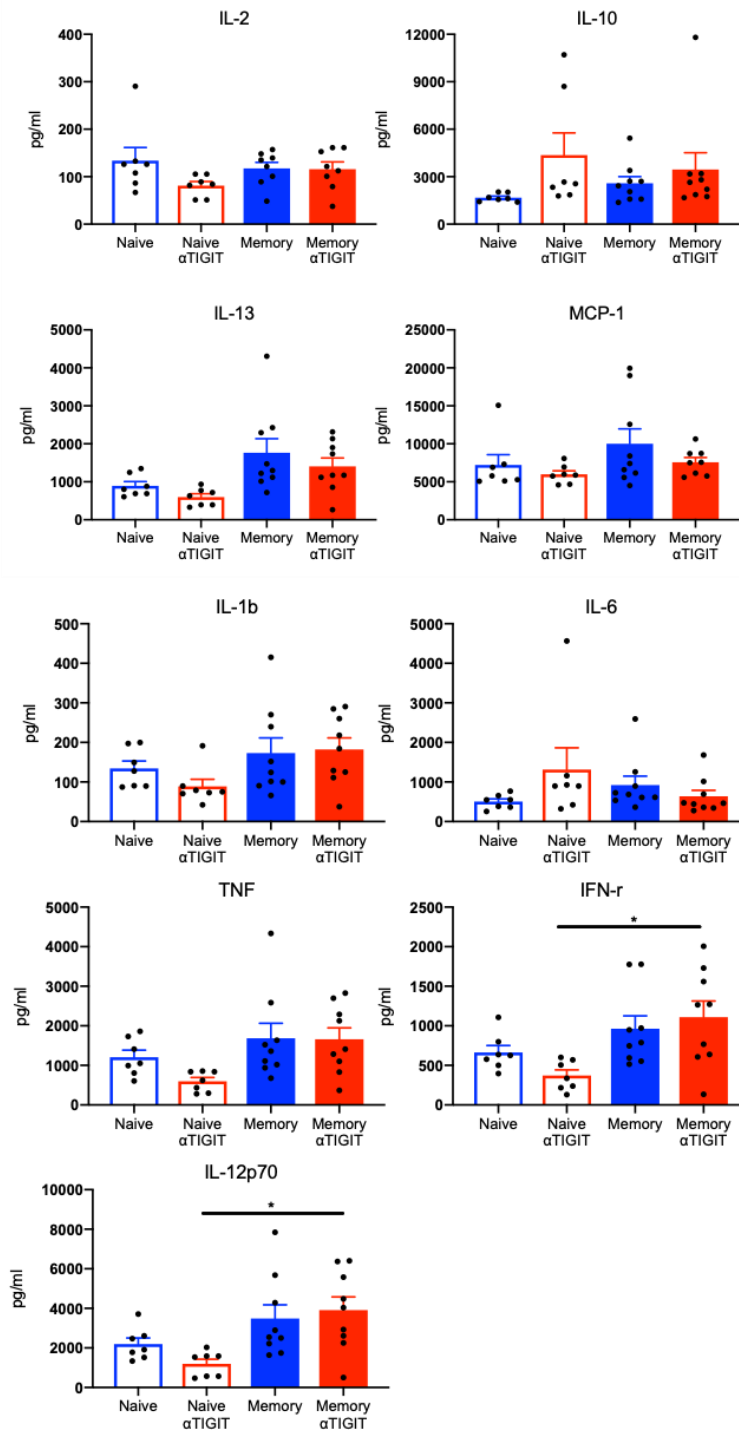

**Supplemental Figure 5.  $\alpha$ TIGIT Ab does not affect cytokines in peritoneal fluid at 48h post CLP in memory vs. previously naïve septic mice.** Both previously naïve and memory septic mice were administered  $\alpha$ TIGIT Ab or isotype Ab at 12h and 24h post-CLP, and then were sacrificed at 48h after CLP and the sterile peritoneal fluid was obtained for cytokine detection. Summary data of cytokines IL-2, IL-10, IL-13, MCP-1, IL-1beta, IL-6, TNF, IFN- $\gamma$ , and IL-12p70 are shown as measured in the peritoneal fluid in the four groups. All data depicted a minimum of two independent experiments. Groups were compared using one-way ANOVA analysis and Turkey multiple comparison test.

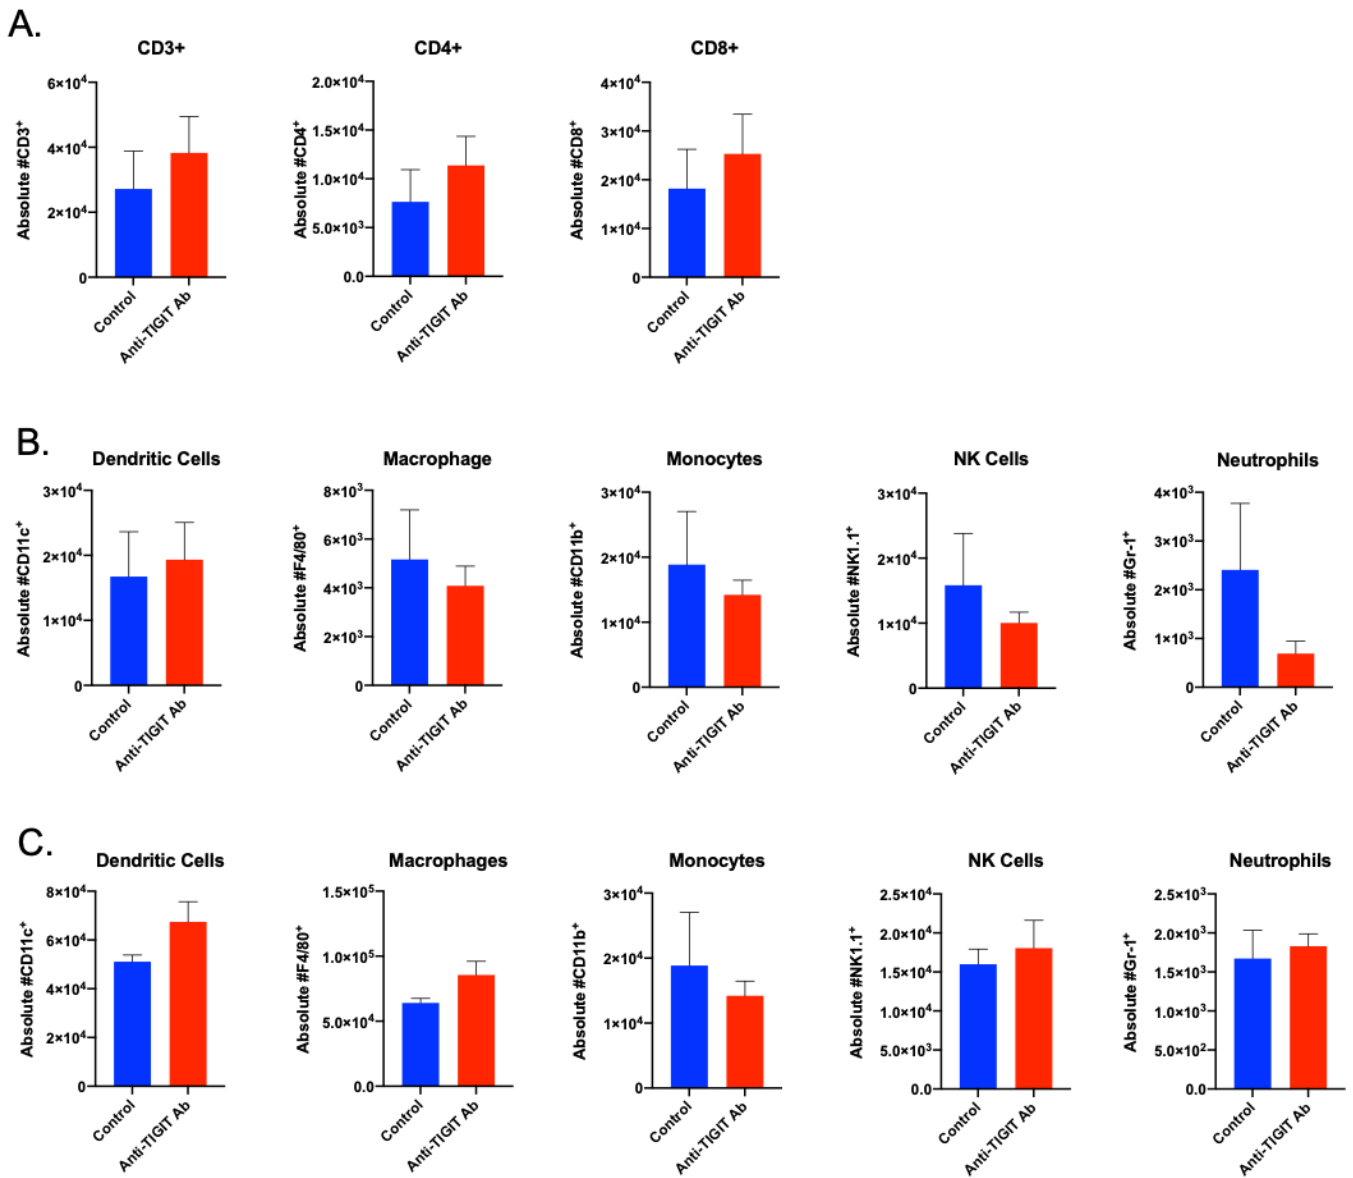

**Supplemental Figure 6. Analysis of numbers of innate and adaptive immune cell subsets in the spleen and peritoneal fluid of isotype vs. anti-TIGIT treated septic memory mice.** A, Peritoneal fluid was harvested from memory septic mice at 48h post CLP and numbers of CD3<sup>+</sup>, CD4<sup>+</sup>, and CD8<sup>+</sup> T cells were analyzed by flow cytometry. B, Numbers of CD11c<sup>+</sup> DC, F4/80<sup>+</sup> macrophages, CD11b<sup>+</sup> monocytes, NK1.1<sup>+</sup> NK cells, and Gr-1<sup>+</sup> neutrophils were assessed in the peritoneal fluid at 48h post-CLP by flow cytometry. C, Numbers of CD11c<sup>+</sup> DC, F4/80<sup>+</sup> macrophages, CD11b<sup>+</sup> monocytes, NK1.1<sup>+</sup> NK cells, and Gr-1<sup>+</sup> neutrophils were assessed in the spleen at 48h post-CLP by flow cytometry. Groups were compared using Mann-Whitney nonparametric test.
